# Supplementary material
Source: PubMed Central journal article supplement (PMC2785341)
Supplement: supp_M109.005132_jbc.M109.005132-2.pdf [file supp_M109.005132_jbc.M109.005132-2.pdf]

Supplementary Figure 1.

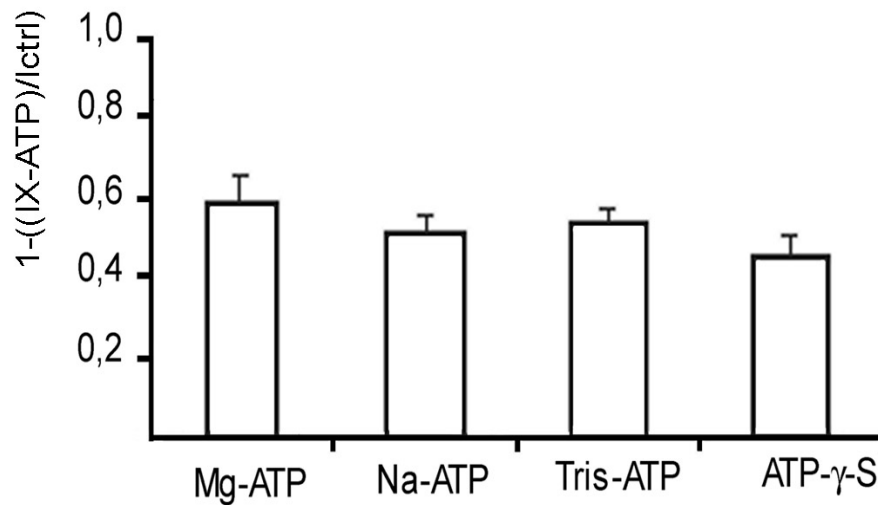

**ATP inhibits AtCLCa current independently of the presence of Mg<sup>2+</sup>.** The fraction of the inhibited current,  $1 - (I_{(X-ATP)} / I_{(ctrl)})$ , recorded at +43 mV in the presence of 5 mM X-ATP + Baf A1, where X-ATP is: Mg-ATP (n=6), Na-ATP (n = 3), Tris-ATP (n = 3) and of 1 mM ATP-γ-S (n =3 ). Columns represent the average values, and the bar is the standar deviation of the mean. The application of 5 mM Na-ATP and Tris-ATP led to an inhibition of the current at +43 mV of  $(50 \pm 5)\%$  (n = 3) and  $(53 \pm 4)\%$  (n=3), respectively, comparable to the one induced by 5 mM Mg-ATP. At +43 mV the addition of 1 mM ATP-γ-S induced an inhibition of the current of  $43 \pm 5\%$  (n = 3), comparable to the one induced by 1 mM Mg-ATP ( $55 \pm 5\%$ ).
