# Supplementary material
Source: PubMed Central journal article supplement (PMC2785341)
Supplement: supp_M109.005132_jbc.M109.005132-3.pdf [file supp_M109.005132_jbc.M109.005132-3.pdf]

## Supplementary Figure 2

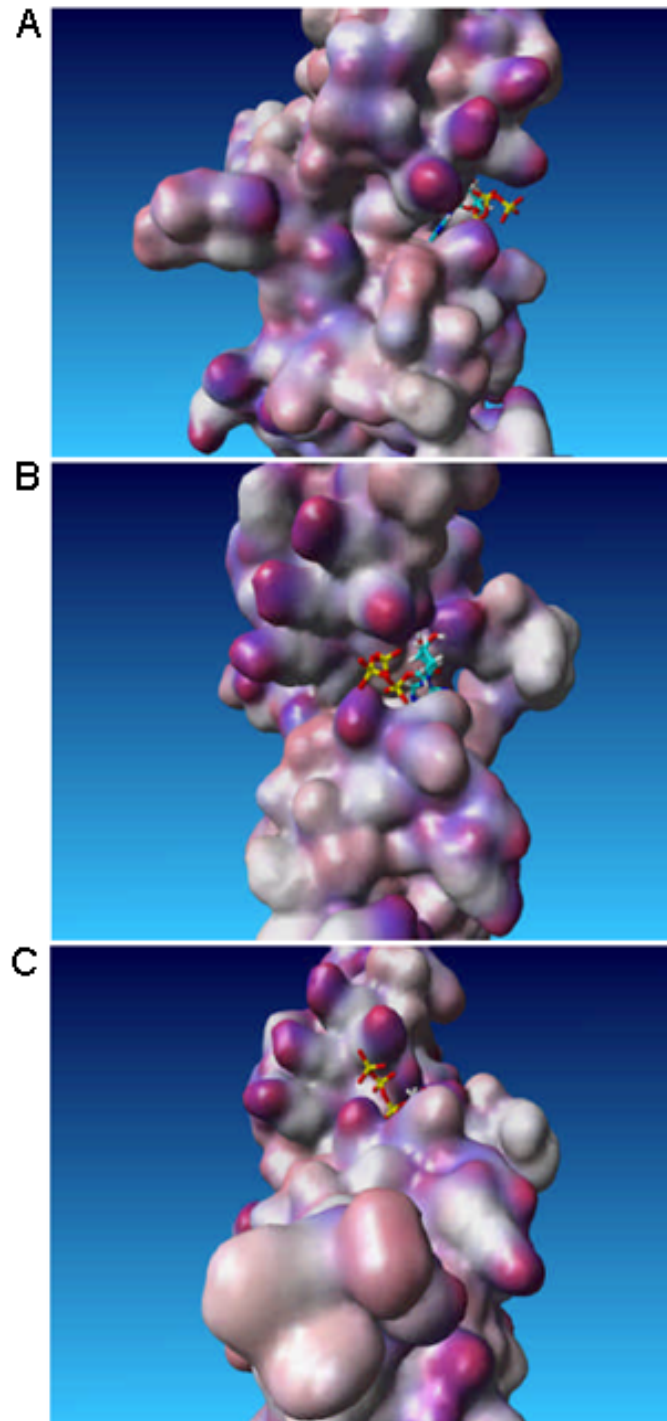

Representation of the ATP binding site of the AtCLCa homology model. In A, B and C the protein is shown as van der Waals surface coloured by atomic charge; the ATP molecule is represented as sticks and coloured according to the elements (*red*: Oxygen, *blue*: nitrogen, *yellow*: phosphor, *cyan*: carbon, *white*: hydrogen). In each panel, the CBS1 motif is on the top and the CBS2 motif is on the bottom. The ATP molecule is inserted at the interface of the two CBS domains with the adenine moiety and the phosphate groups interacting with the protein residues. Starting from panel A, panel B is 90° rotated around the vertical axis and panel C is 90° rotated around horizontal axis.
